# Supplementary material for: Fast removal of aqueous Hg(ii) with quaternary ammonium-functionalized magnetic mesoporous silica and silica regeneration
Source: Royal Society of Chemistry journal article supplement (doi:10.1039/c1jm10111k), 2011-01-01
Supplement: c1jm10111k.pdf [file c1jm10111k.pdf]

Supplementary Information

for

**Fast removal of aqueous Hg(II) with quaternary ammonium-functionalized magnetic mesoporous silica and regeneration**

Jinshui Liu<sup>ab</sup> and Xuezhong Du<sup>\*a</sup>

---

<sup>a</sup>Key Laboratory of Mesoscopic Chemistry (Ministry of Education), School of Chemistry and Chemical Engineering, Nanjing University, Nanjing 210093, P. R. China. E-mail: xzdu@nju.edu.cn. Fax: 86-25-83317761

<sup>b</sup>Anhui Key Laboratory of Functional Molecular Solids, College of Chemistry and Materials Science, Anhui Normal University, Wuhu 241000, P. R. China

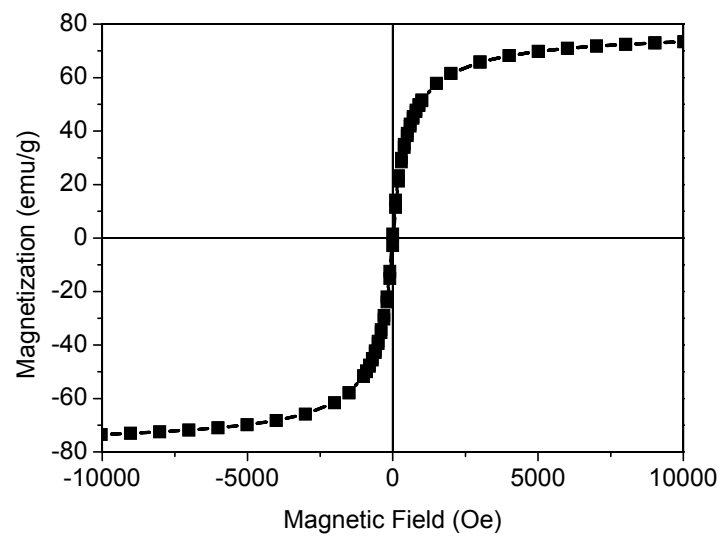

**Fig. S1** Field-dependent magnetization curves of  $\text{Fe}_3\text{O}_4$  nanoparticles at 300 K.

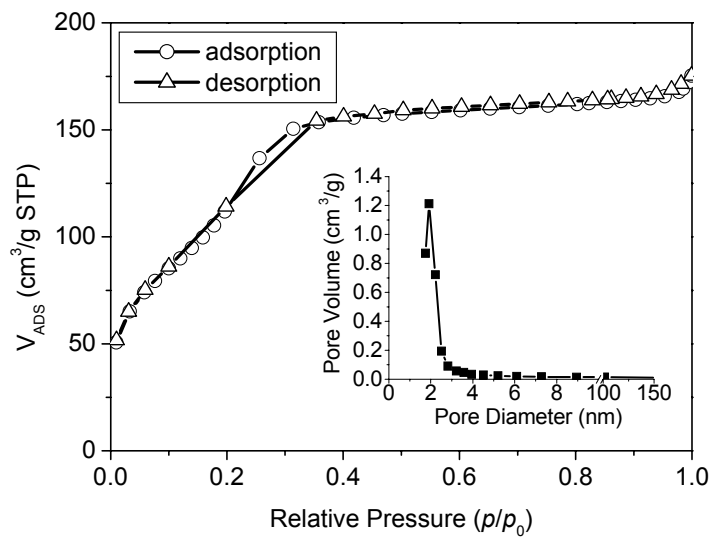

**Fig. S2** Nitrogen adsorption–desorption isotherms of AMMS. The inset shows pore size distribution of AMMS.

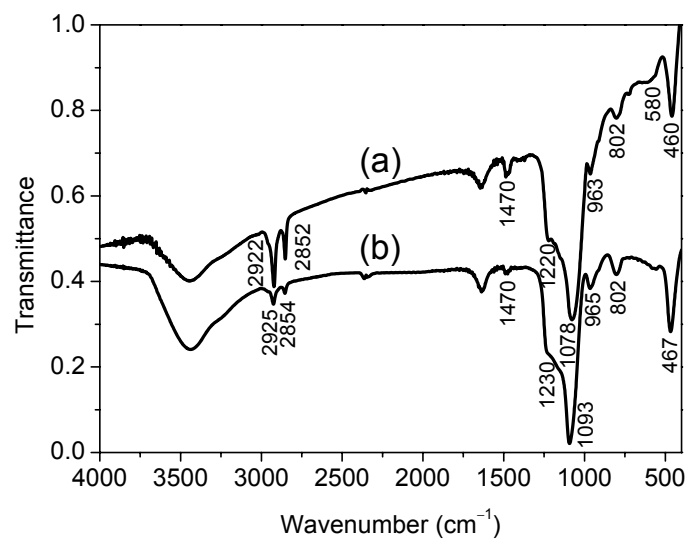

**Fig. S3** FTIR spectra of AMMS: (a) before surfactant extraction; (b) after surfactant extraction.

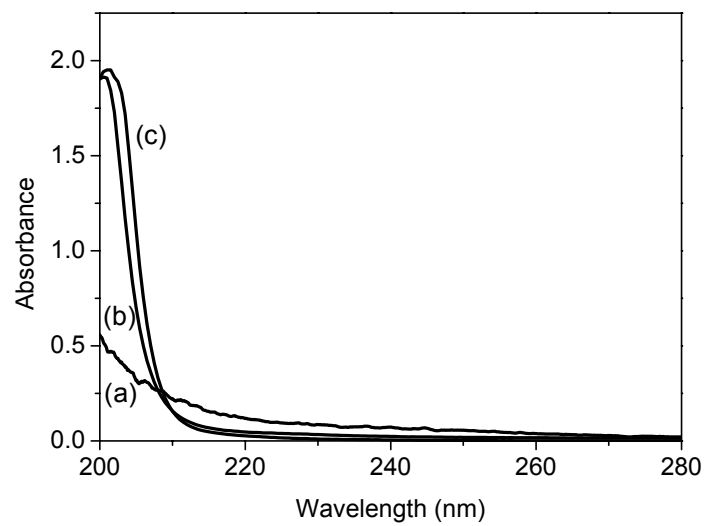

**Fig. S4** UV-vis spectra of (a) PDDA (0.01 mol/L), (b) BTAC (0.20 mol/L), (c) NaCl (0.25 mol/L).

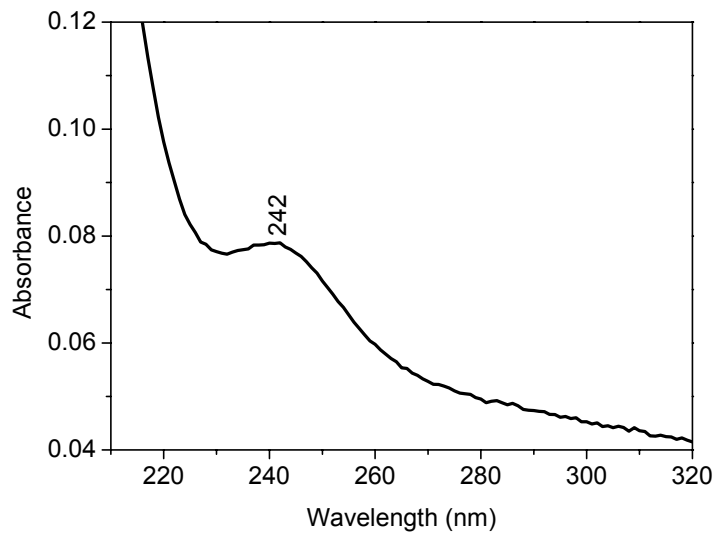

**Fig. S5** UV-vis spectrum of a TTAC-functionalized quartz plate after Hg(II) adsorption with a counterpart before Hg(II) adsorption as a reference.

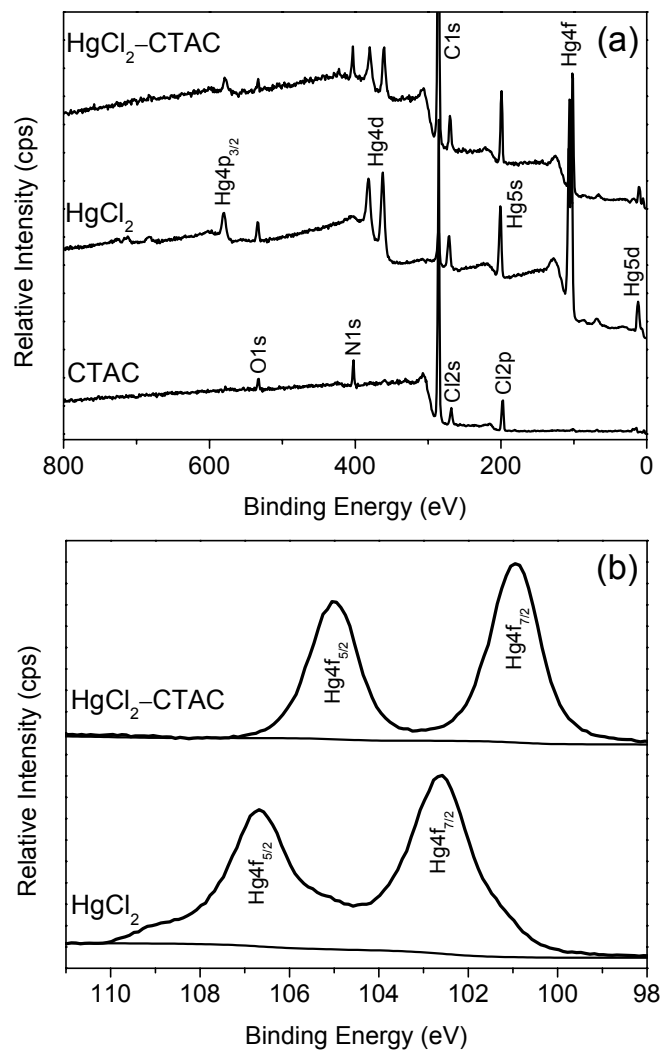

**Fig. S6** XPS spectra of CTAC, HgCl<sub>2</sub>, and CTAC complex with HgCl<sub>2</sub>: (a) survey scans; (b) high-resolution scans in the regions of Si2p and Hg4f binding energies

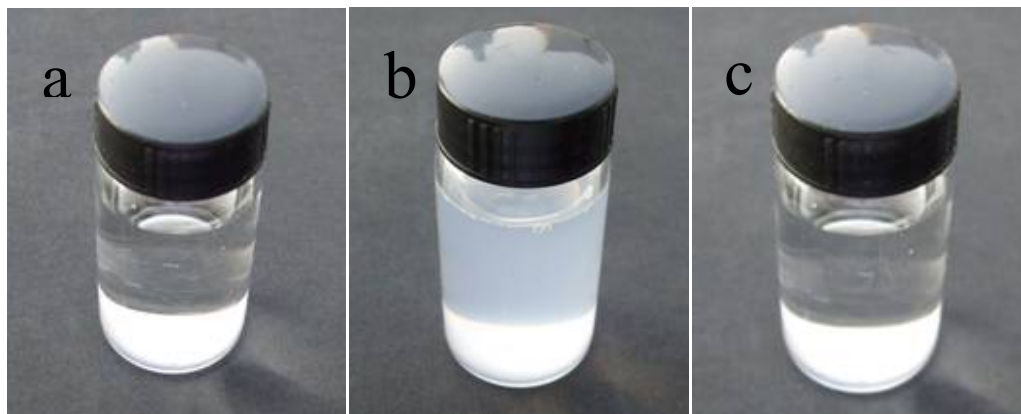

**Fig. S7** Photographs of vials containing aqueous CTAC solution (1 mmol/L) in the absence or presence of HgCl<sub>2</sub> (0.085 mmol/L) at different pH: (a) none, pH 5.5; (b) HgCl<sub>2</sub>, pH 5.5; (c) HgCl<sub>2</sub>, pH 8.5.
